# Supplementary material for: Elucidation of Callistemon lanceolatus-derived natural compounds in STAT 3 pathway against human cancer cells: in silico and in vitro studies
Source: Frontiers journal article supplement (doi:10.3389/fphar.2025.1507002), 2025-02-21
Supplement: Image_1.pdf [file Image_1.pdf]

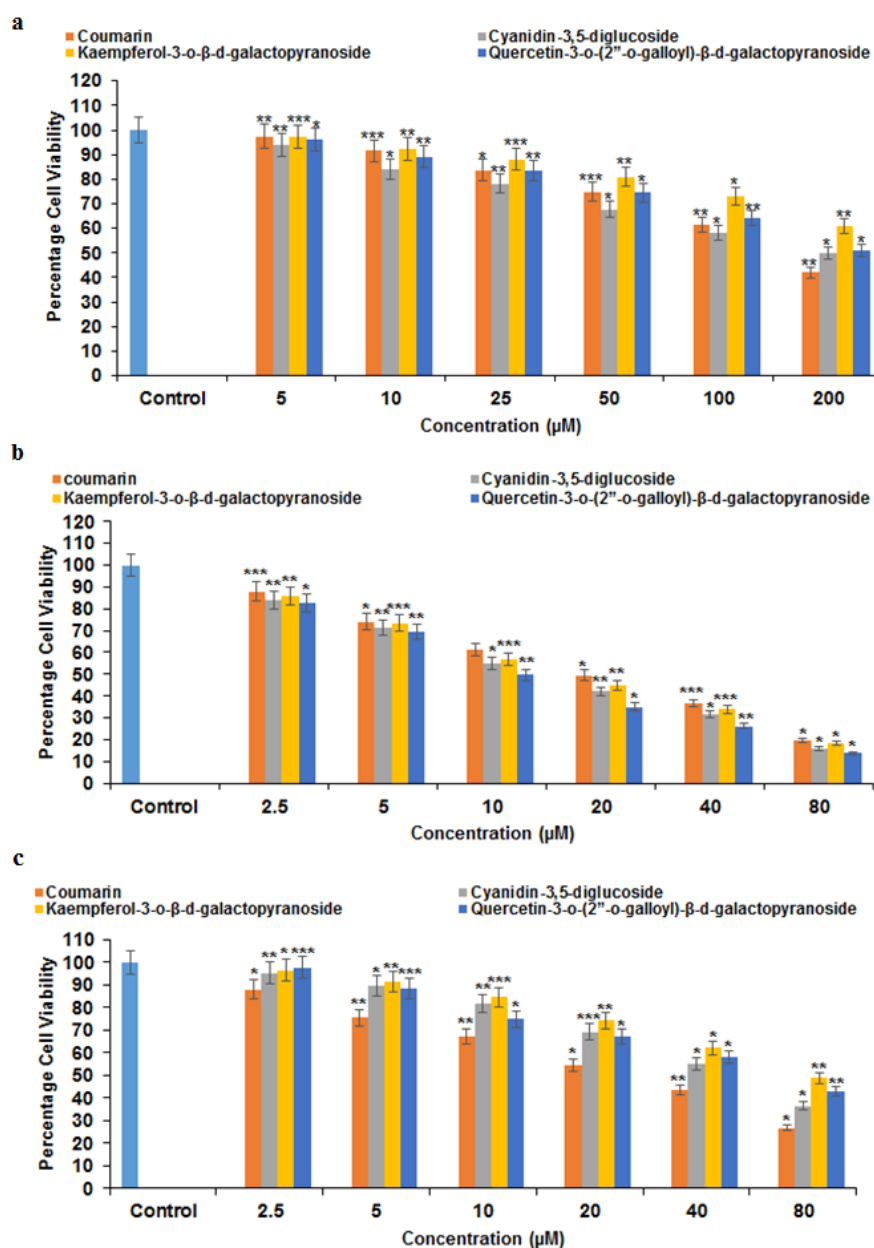

**Supplementary Figure 1. Cytotoxic assay of (a).** Compounds cyanidin-3,5-diglucoside, kaempferol-3-o-β-d-galactopyranoside and quercetin-3-o-(2''-o-galloyl)-β-d-galactopyranoside on HEK293 cells. **(b)** Anti-proliferation assay of compounds cyanidin-3, 5-diglucoside, kaempferol-3-o-β-d-galactopyranoside and quercetin-3-o-(2''-o-galloyl)-β-d-galactopyranoside on HeLa cells and **(c).** Compounds cyanidin-3, 5-diglucoside, kaempferol-3-o-β-d-galactopyranoside and quercetin-3-o-(2''-o-galloyl)-β-d-galactopyranoside on MCF-7 cells. Data represent three independent tests of experiments and results are shown as the mean ± SD. Coumarin is used as a positive control. \* $p < 0.05$ ; \*\* $p < 0.001$ ; \*\*\* $p < 0.005$  compared with the control.
